# Supplementary material for: Label-free detection of DNA using a light-addressable potentiometric sensor modified with a positively charged polyelectrolyte layer
Source: Royal Society of Chemistry journal article supplement (doi:10.1039/c4nr07225a), 2015-01-01
Supplement: c4nr07225a1.pdf [file c4nr07225a1.pdf]

### Supporting information

To investigate the effect of the probe ssDNA concentration on the immobilization signal, the probe molecules were immobilized from solutions of 0.5  $\mu\text{M}$ , 2.5  $\mu\text{M}$ , 5  $\mu\text{M}$ , 7.5  $\mu\text{M}$  and 10  $\mu\text{M}$  ssDNA. With increasing ssDNA concentration from 0.5  $\mu\text{M}$  to 5  $\mu\text{M}$ , the immobilization signal increases from 55 mV to 80 mV. Further increase of the ssDNA concentration results in a less stable immobilization signal. As a consequence, in further experiments, probe molecules were immobilized from a 5  $\mu\text{M}$  ssDNA solution.

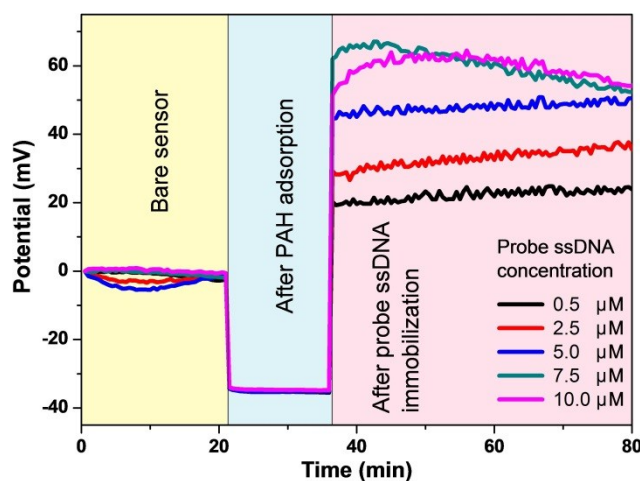

Figure S1. Potential shifts of the MLAPS after consecutive LbL adsorption of PAH and probe ssDNA molecules. The PAH layer was prepared from 10  $\mu\text{M}$  PAH solution. The probe ssDNA molecules were immobilized from solutions with different ssDNA concentrations of 0.5  $\mu\text{M}$ , 2.5  $\mu\text{M}$ , 5.0  $\mu\text{M}$ , 7.5  $\mu\text{M}$  and 10  $\mu\text{M}$ . The measured data were averaged over 16 measurement spots.
